# Supplementary material for: The Effects of Physical Exercise with Music on Cognitive Function of Elderly People: Mihama-Kiho Project
Source: PubMed Central journal article supplement (PMC4000225; doi:10.1371/journal.pone.0095230), 2014-04-25
Supplement: pone.0095230.s001.pdf [file pone.0095230.s001.pdf]

**Table S1. Grades of activities of daily life from the Ministry of Health, Labour and Welfare in Japan.**

| <b>grade</b> | <b>content</b>                                                                                                                                                          |
|--------------|-------------------------------------------------------------------------------------------------------------------------------------------------------------------------|
| I            | Subject who has slight exercise each day. He/she takes a walk or shopping about an hour a day, and spends most of his/her time sitting.                                 |
| II           | Subject who has moderate exercise each day. He/she walks for two hours a day by commuting or working. At other times, he/she spends a lot of time sitting.              |
| III          | Subject who has strenuous exercise each day. He/she who fulfills grade II and engages in hard jobs such as agriculture and fishing for more than one hour each day.     |
| IV           | Subject who has very strenuous exercise each day. He/she spends more than one hour doing hard training, or engaged in forestry or agriculture in a busy farming season. |
